# Supplementary material for: Sleep Patterns and Neuropsychiatric Symptoms in Hospitalized Patients With Dementia
Source: Atypon-hosted journal article supplement (doi:10.1176/appi.neuropsych.16090166), 2017-03-15
Supplement: appi.neuropsych.16090166.ds001.pdf [file appi.neuropsych.16090166.ds001.pdf]

Data Supplement for Tanev et al., Sleep Patterns and Neuropsychiatric Symptoms in Hospitalized Patients With Dementia, J Neuropsychiatry Clin Neurosci (doi: 10.1176/appi.neuropsych.16090166)

| <b>eTable 1: Beginning and End Averages of Sleep Parameters and Neuropsychiatric Symptoms</b> |                                 |             |           |            |            |                                |             |                |            |            |
|-----------------------------------------------------------------------------------------------|---------------------------------|-------------|-----------|------------|------------|--------------------------------|-------------|----------------|------------|------------|
| <b>Variable</b>                                                                               | <b>Average First Two Nights</b> |             |           |            |            | <b>Average Last Two Nights</b> |             |                |            |            |
|                                                                                               | <b>N</b>                        | <b>Mean</b> | <b>SD</b> | <b>Min</b> | <b>Max</b> | <b>N</b>                       | <b>Mean</b> | <b>Std Dev</b> | <b>Min</b> | <b>Max</b> |
| <b>Sleep minutes</b>                                                                          | 28                              | 381         | 165.3     | 21         | 630        | 28                             | 387.4       | 177.9          | 0          | 630        |
| <b>Mean sleep episode</b>                                                                     | 28                              | 77.52       | 135.9     | 3.61       | 630        | 28                             | 123.4       | 203.4          | 0          | 630        |
| <b>Sleep efficiency</b>                                                                       | 27                              | 76.56       | 19.93     | 11.3       | 100        | 25                             | 74.36       | 18.99          | 40.5       | 100        |
| <b>Wake minutes</b>                                                                           | 28                              | 249         | 165.3     | 0          | 609        | 28                             | 242.6       | 177.9          | 0          | 630        |
| <b>Wake after sleep onset</b>                                                                 | 27                              | 124         | 116.2     | 0          | 541        | 25                             | 144.7       | 106.4          | 0          | 331        |
| <b>Mean wake episode</b>                                                                      | 28                              | 56.06       | 124.9     | 0          | 609        | 28                             | 38.1        | 116.6          | 0          | 630        |
| <b>NPI total</b>                                                                              | 28                              | 37.09       | 16.53     | 5.5        | 74         | 28                             | 18.8        | 13.31          | 1          | 58.5       |
| <b>NPI agitation/aggression subscale</b>                                                      | 28                              | 4.66        | 3.97      | 0          | 12         | 28                             | 2.3         | 2.73           | 0          | 9          |
| <b>NPI depression/dysphoria subscale</b>                                                      | 28                              | 2.96        | 3.3       | 0          | 12         | 28                             | 1.63        | 2.59           | 0          | 8          |
| <b>NPI delusions subscale</b>                                                                 | 28                              | 1.5         | 2.23      | 0          | 7.5        | 28                             | 1.18        | 2.39           | 0          | 9          |
| <b>NPI hallucinations subscale</b>                                                            | 28                              | 1.75        | 2.37      | 0          | 7.5        | 28                             | 1.02        | 2.18           | 0          | 10         |
| <b>NPI anxiety subscale</b>                                                                   | 28                              | 3.07        | 2.97      | 0          | 9          | 28                             | 2.23        | 2.7            | 0          | 7.5        |
| <b>NPI elation/euphoria subscale</b>                                                          | 28                              | 0.07        | 0.38      | 0          | 2          | 28                             | 0.2         | 0.77           | 0          | 4          |
| <b>NPI apathy/indifference subscale</b>                                                       | 28                              | 5.43        | 4.28      | 0          | 12         | 28                             | 3.09        | 3.16           | 0          | 12         |
| <b>NPI disinhibition subscale</b>                                                             | 28                              | 2.46        | 3.1       | 0          | 12         | 28                             | 0.41        | 1.03           | 0          | 4          |
| <b>NPI irritability subscale</b>                                                              | 28                              | 4.54        | 3.86      | 0          | 12         | 28                             | 2           | 2.7            | 0          | 9          |
| <b>NPI aberrant motor behavior subscale</b>                                                   | 28                              | 1.82        | 3.31      | 0          | 12         | 28                             | 0.57        | 1.45           | 0          | 6          |
| <b>NPI nighttime behaviors subscale</b>                                                       | 28                              | 3.73        | 3.29      | 0          | 12         | 28                             | 1.79        | 2.67           | 0          | 12         |
| <b>NPI appetite/eating behaviors subscale</b>                                                 | 28                              | 4.79        | 4.1       | 0          | 12         | 28                             | 2.45        | 4              | 0          | 12         |
| <b>DBRS</b>                                                                                   | 29                              | 7.02        | 1.91      | 5.25       | 11.5       | 29                             | 5.9         | 0.96           | 5.25       | 9.5        |
| <b>RAGE</b>                                                                                   | 29                              | 9.26        | 8.69      | 0          | 25.5       | 29                             | 2.93        | 5.52           | 0          | 24         |
| <b>MADRS</b>                                                                                  | 25                              | 28.36       | 10.44     | 7          | 44         | 11                             | 18.27       | 12.03          | 3          | 44         |
| <b>CSDD</b>                                                                                   | 26                              | 13.85       | 5.91      | 1          | 22         | 11                             | 8.45        | 8.56           | 1          | 28         |

**Averages of sleep parameters are calculated based on first or last 2 nighttime measurements. Averages of neuropsychiatric symptoms are calculated based on first or last 2 daytime measurements.**

**eTable 2: Changes in Sleep Parameters and Neuropsychiatric Symptoms**

| Variable                            | N  | Difference (start-end)* | SD   | 95% CI             | Min    | Max    | DF | Paired T-Test | P                 |
|-------------------------------------|----|-------------------------|------|--------------------|--------|--------|----|---------------|-------------------|
| Sleep minutes                       | 27 | -2.3                    | 27.3 | [-13.1058, 8.4983] | -      | 56.10  | 26 | -0.44         | 0.6647            |
| Mean sleep episode                  | 27 | -5.6                    | 23.8 | [-14.9954, 3.8260] | -      | 25.98  | 26 | -1.22         | 0.2335            |
| Sleep efficiency                    | 24 | 0.0                     | 1.7  | [-0.7555, 0.6871]  | -3.55  | 2.87   | 23 | -0.1          | 0.9228            |
| Wake minutes                        | 27 | 2.3                     | 27.3 | [-8.4983, 13.1058] | -56.10 | 101.50 | 26 | 0.44          | 0.6647            |
| Wake after sleep onset              | 24 | -0.4                    | 9.1  | [-4.2625, 3.3947]  | -15.96 | 21.86  | 23 | -0.23         | 0.8167            |
| NPI total score                     | 28 | 1.9                     | 2.1  | [1.0952, 2.6986]   | -0.73  | 7.90   | 27 | 4.85          | <b>&lt;0.0001</b> |
| NPI agitation/aggression score      | 28 | 0.2                     | 0.3  | [0.0912, 0.3486]   | -0.30  | 1.20   | 27 | 3.51          | <b>0.0016</b>     |
| NPI depression/dysphoria score      | 28 | 0.1                     | 0.3  | [-0.0340, 0.2309]  | -0.80  | 1.20   | 27 | 1.52          | 0.1389            |
| NPI delusions score                 | 28 | 0.1                     | 0.2  | [-0.0417, 0.1508]  | -0.55  | 0.67   | 27 | 1.16          | 0.2549            |
| NPI hallucinations score            | 28 | 0.1                     | 0.3  | [0.0114, 0.2372]   | -0.17  | 1.10   | 27 | 2.26          | 0.0321            |
| NPI anxiety score                   | 28 | 0.1                     | 0.3  | [-0.0386, 0.2201]  | -0.64  | 1.00   | 27 | 1.44          | 0.1616            |
| NPI elation/euphoria score          | 28 | 0.0                     | 0.1  | [-0.0489, 0.0221]  | -0.44  | 0.17   | 27 | -0.77         | 0.4453            |
| NPI apathy/indifference score       | 28 | 0.3                     | 0.4  | [0.0934, 0.4139]   | -0.67  | 1.10   | 27 | 3.25          | <b>0.0031</b>     |
| NPI disinhibition score             | 28 | 0.2                     | 0.3  | [0.0967, 0.3589]   | 0.00   | 1.20   | 27 | 3.56          | <b>0.0014</b>     |
| NPI irritability score              | 28 | 0.2                     | 0.3  | [0.0850, 0.3172]   | -0.50  | 0.90   | 27 | 3.56          | <b>0.0014</b>     |
| NPI aberrant behaviors score        | 28 | 0.1                     | 0.3  | [-0.00574, 0.2138] | -0.29  | 1.20   | 27 | 1.94          | 0.0623            |
| NPI nighttime behaviors score       | 28 | 0.2                     | 0.6  | [0.0201, 0.4635]   | -0.80  | 2.40   | 27 | 2.24          | 0.0337            |
| NPI appetite/eating behaviors score | 28 | 0.3                     | 0.4  | [0.1348, 0.4344]   | -0.17  | 1.20   | 27 | 3.9           | <b>0.0006</b>     |
| RAGE                                | 28 | 0.5                     | 0.6  | [0.2659, 0.7606]   | -0.40  | 2.30   | 27 | 4.26          | <b>0.0002</b>     |
| DBRS                                | 28 | 0.1                     | 0.1  | [0.0329, 0.1387]   | -0.07  | 0.45   | 27 | 3.33          | <b>0.0025</b>     |
| MADRS                               | 11 | 1.1                     | 1.6  | [0.00599, 2.1540]  | -0.93  | 4.25   | 10 | 2.24          | 0.0490            |
| CSDD                                | 11 | 0.6                     | 0.9  | [0.0130, 1.2724]   | -1.20  | 1.86   | 10 | 2.27          | 0.0463            |

\*Changes from beginning to end of participation, weighted for participation days

**eTable 3: Additional Correlations of Beginning to End of Study Weighted Changes in Sleep Parameters and Neuropsychiatric Symptoms**

|                                          | Sleep minutes | Mean sleep episode | Sleep efficiency | Wake minutes | Wake after sleep onset |
|------------------------------------------|---------------|--------------------|------------------|--------------|------------------------|
| <b>NPI total score</b>                   | r=-0.07519    | -0.16              | -0.03            | 0.08         | 0.07                   |
|                                          | p=0.7093      | 0.42               | 0.90             | 0.71         | 0.73                   |
|                                          | N=27          | 27.00              | 24.00            | 27.00        | 24.00                  |
| <b>NPI agitation subscale</b>            | -0.32         | -0.33              | -0.20            | 0.32         | 0.22                   |
|                                          | 0.10          | 0.09               | 0.36             | 0.10         | 0.29                   |
|                                          | 27.00         | 27.00              | 24.00            | 27.00        | 24.00                  |
| <b>NPI depression subscale</b>           | 0.34          | 0.23               | 0.41             | -0.34        | -0.48                  |
|                                          | 0.09          | 0.26               | 0.05             | 0.09         | 0.02                   |
|                                          | 27.00         | 27.00              | 24.00            | 27.00        | 24.00                  |
| <b>NPI delusions subscale</b>            | -0.37         | -0.48              | -0.12            | 0.37         | 0.11                   |
|                                          | 0.06          | 0.01               | 0.59             | 0.06         | 0.61                   |
|                                          | 27.00         | 27.00              | 24.00            | 27.00        | 24.00                  |
| <b>NPI hallucinations subscale</b>       | -0.29         | -0.31              | -0.06            | 0.29         | 0.11                   |
|                                          | 0.14          | 0.11               | 0.78             | 0.14         | 0.62                   |
|                                          | 27.00         | 27.00              | 24.00            | 27.00        | 24.00                  |
| <b>NPI anxiety subscale</b>              | -0.36         | -0.58              | -0.04            | 0.36         | -0.08                  |
|                                          | 0.07          | 0.0014             | 0.87             | 0.07         | 0.71                   |
|                                          | 27.00         | 27.00              | 24.00            | 27.00        | 24.00                  |
| <b>NPI elation subscale</b>              | 0.05          | 0.00               | 0.16             | -0.05        | -0.14                  |
|                                          | 0.82          | 0.99               | 0.47             | 0.82         | 0.51                   |
|                                          | 27.00         | 27.00              | 24.00            | 27.00        | 24.00                  |
| <b>NPI apathy subscale</b>               | 0.54          | 0.57               | 0.18             | -0.54        | -0.06                  |
|                                          | 0.0034        | 0.0020             | 0.40             | 0.0034       | 0.78                   |
|                                          | 27.00         | 27.00              | 24.00            | 27.00        | 24.00                  |
| <b>NPI disruptive behaviors subscale</b> | -0.36         | -0.38              | -0.41            | 0.36         | 0.48                   |
|                                          | 0.07          | 0.05               | 0.05             | 0.07         | 0.02                   |
|                                          | 27.00         | 27.00              | 24.00            | 27.00        | 24.00                  |
| <b>NPI irritability subscale</b>         | 0.35          | 0.35               | -0.02            | -0.35        | 0.04                   |
|                                          | 0.08          | 0.07               | 0.93             | 0.08         | 0.85                   |
|                                          | 27.00         | 27.00              | 24.00            | 27.00        | 24.00                  |
| <b>NPI aberrant behaviors subscale</b>   | 0.15          | -0.13              | 0.16             | -0.15        | -0.12                  |
|                                          | 0.46          | 0.53               | 0.45             | 0.46         | 0.59                   |
|                                          | 27.00         | 27.00              | 24.00            | 27.00        | 24.00                  |
| <b>NPI nighttime behaviors subscale</b>  | -0.18         | -0.08              | -0.07            | 0.18         | 0.12                   |
|                                          | 0.37          | 0.70               | 0.74             | 0.37         | 0.58                   |
|                                          | 27.00         | 27.00              | 24.00            | 27.00        | 24.00                  |

|                          |       |       |       |       |       |
|--------------------------|-------|-------|-------|-------|-------|
| <b>DBRS total score</b>  | -0.23 | -0.27 | -0.42 | 0.23  | 0.36  |
|                          | 0.25  | 0.18  | 0.04  | 0.25  | 0.08  |
|                          | 27.00 | 27.00 | 24.00 | 27.00 | 24.00 |
| <b>RAGE total score</b>  | -0.14 | -0.18 | -0.21 | 0.14  | 0.21  |
|                          | 0.47  | 0.38  | 0.34  | 0.47  | 0.33  |
|                          | 27.00 | 27.00 | 24.00 | 27.00 | 24.00 |
| <b>MADRS total score</b> | 0.20  | 0.35  | 0.38  | -0.20 | -0.39 |
|                          | 0.55  | 0.29  | 0.28  | 0.55  | 0.26  |
|                          | 11.00 | 11.00 | 10.00 | 11.00 | 10.00 |
| <b>CSDD total score</b>  | 0.10  | 0.27  | 0.15  | -0.10 | -0.21 |
|                          | 0.77  | 0.43  | 0.67  | 0.77  | 0.56  |
|                          | 11.00 | 11.00 | 10.00 | 11.00 | 10.00 |
